# Supplementary material for: Probiotic Bacillus licheniformis ZW3 Alleviates DSS-Induced Colitis and Enhances Gut Homeostasis
Source: MDPI journal article supplement (doi:10.3390/ijms25010561), 2024-01-01
Supplement: s1 [file s1]

# Supplementary Materials

## 1. Supplementary Figures

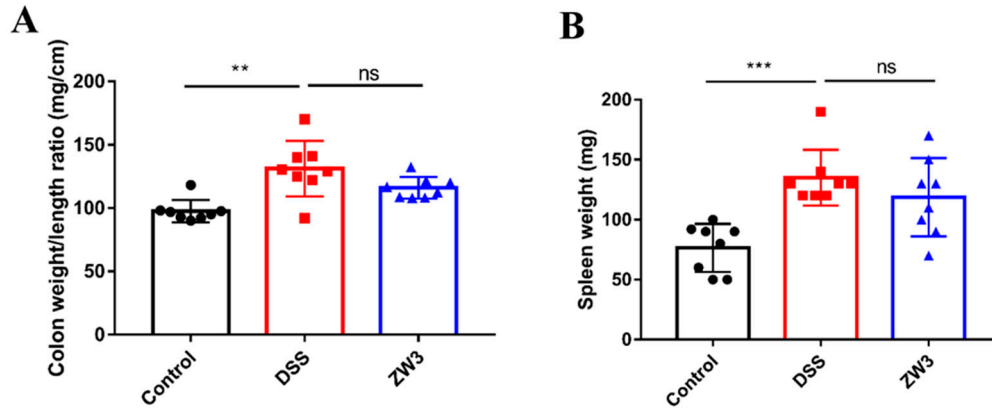

**Figure S1.** *B. licheniformis* ZW3 attenuates DSS-induced colitis symptoms. (A) Colon weight/length ratio and (B) spleen weight of the mice with free drinking water (Control), DSS (DSS), and ZW3 plus DSS (ZW3). \*\* $p < 0.01$ , \*\*\* $p < 0.001$ , and ns, not significant.

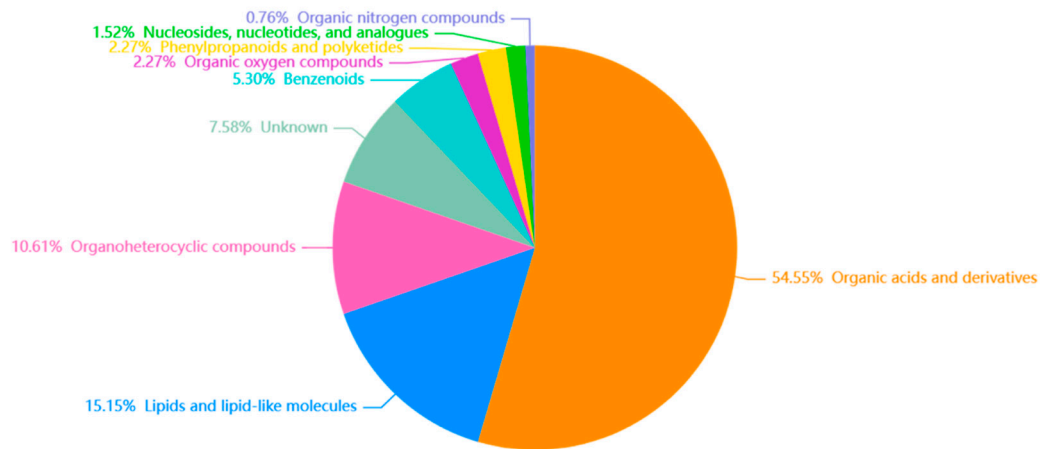

**Figure S2.** MS2 superclass classification of the differential metabolites between the colitis mice and ZW3-treated colitis mice.

## 2. Supplementary Tables

**Table S1.** Metabolomic changes in the colonic contents between mice in the ZW3 group and DSS group

| Metabolites                        | RT (min) | VIP  | Ratio | Regulated | Mode |
|------------------------------------|----------|------|-------|-----------|------|
| Cinobufagin                        | 4.605    | 3.92 | 11.76 | ↑         | -    |
| Arg-Leu                            | 2.260    | 2.60 | 7.91  | ↑         | +    |
| Lys-Leu                            | 1.990    | 2.36 | 7.57  | ↑         | +    |
| Guanosine                          | 2.801    | 2.30 | 6.41  | ↑         | -    |
| Hydroxypropyl-Lysine               | 2.249    | 2.42 | 6.31  | ↑         | -    |
| Histidiny-Leucine                  | 1.988    | 2.54 | 6.20  | ↑         | +    |
| Deuteroporphyrin IX                | 4.614    | 3.30 | 6.18  | ↑         | -    |
| Guanosine                          | 2.796    | 2.30 | 5.97  | ↑         | +    |
| Glutamine                          | 0.940    | 2.24 | 4.00  | ↑         | -    |
| Ureidoisobutyric acid              | 0.978    | 2.21 | 3.81  | ↑         | +    |
| Guanine                            | 2.804    | 1.84 | 3.49  | ↑         | -    |
| Hypoxanthine                       | 2.797    | 1.38 | 2.19  | ↑         | +    |
| Uric acid                          | 1.080    | 3.64 | 0.015 | ↓         | -    |
| 1-(2-Pyrimidinyl)-4-piperidinamine | 8.170    | 2.21 | 0.33  | ↓         | +    |
| 2-hydroxyhexanoylglycine           | 3.336    | 2.08 | 0.21  | ↓         | -    |
| Stearamide                         | 5.434    | 1.87 | 0.36  | ↓         | +    |
| 1,4-Diaminonaphthalene             | 3.510    | 1.89 | 0.37  | ↓         | +    |
| 3-Oxostearic acid                  | 5.496    | 1.34 | 0.44  | ↓         | +    |

**Table S2.** Disease activity index (DAI) score of DSS-induced colitis

| Score | Weight loss | Bloody stools          | Stool consistency |
|-------|-------------|------------------------|-------------------|
| 0     | None        | None                   | Normal            |
| 1     | 1-5%        | -                      | -                 |
| 2     | 6-10%       | Blood visible in stool | Loose stools      |
| 3     | 11-15%      | -                      | -                 |
| 4     | Over 15%    | Gross bleeding         | Diarrhea          |

**Table S3.** Histological scores of DSS-induced colitis

| Score | Epithelium loss | Crypt loss | Infiltration of inflammatory cells | Depletion of goblet cells |
|-------|-----------------|------------|------------------------------------|---------------------------|
| 0     | None            | None       | None                               | None                      |
| 1     | 0%-5%           | 0%-10%     | Mild                               | Mild                      |
| 2     | 5%-10%          | 10%-20%    | Medium                             | Medium                    |
| 3     | Over 10%        | Over 20%   | Severe                             | Severe                    |

**Table S4.** Antibodies used in this study

|                | <b>Application</b> | <b>Dilution</b> | <b>Manufacturer</b>       | <b>Cat. No.</b> | <b>Lot. No.</b> |
|----------------|--------------------|-----------------|---------------------------|-----------------|-----------------|
| MPO            | IHC                | 1:1000          | Servicebio, Wuhan, China  | GB12224         | AC2111015A      |
| F4/80          | IHC                | 1:300           | Servicebio, Wuhan, China  | GB113373        | AC210730003     |
| MUC2           | IF                 | 1:500           | Servicebio, Wuhan, China  | GB11344         | AC211012453     |
| ZO-1           | IF                 | 1:200           | Servicebio, Wuhan, China  | GB111402        | AC211114002     |
| Occludin       | IF                 | 1:1000          | Servicebio, Wuhan, China  | GB111401        | AC210814001     |
| MUC2           | WB                 | 1:8000          | Abcam, Cambridge, MA, USA | Ab272692        | 1009676-7       |
| ZO-1           | WB                 | 1:5000          | Proteintech, Wuhan, China | 21773-1-AP      | 00114347        |
| Occludin       | WB                 | 1:5000          | Proteintech, Wuhan, China | 27260-1-AP      | 00114087        |
| $\beta$ -actin | WB                 | 1:2000          | Servicebio, Wuhan, China  | GB15003         | AC220918001     |
